# Supplementary material for: Drug Repurposing for Influenza Virus Polymerase Acidic (PA) Endonuclease Inhibitor
Source: MDPI journal article supplement (doi:10.3390/molecules26237326), 2021-12-02
Supplement: s1 [file s1]

Supporting information

# Drug Repurposing for Influenza Virus Polymerase Acidic (PA) Endonuclease Inhibitor

Xin Meng <sup>1,2</sup> and Ye Wang <sup>1,\*</sup>

<sup>1</sup> School of Life Science, Jilin University, No. 2699 Qianjin Street, Changchun 130012, China

<sup>2</sup> School of Life Science, Jilin Normal University, Siping 136000, China; 18624395651@163.com

\* Correspondence: wangye0106@jlu.edu.cn; Tel.: +86-431-8515-5249

**Table S1.** The properties and energy score of the potential PAN inhibitors.

| Chemical name | Structure                                                                           | Energy*<br>(kcal/mol) | M <sub>wt</sub> | Chemical Formula                                                                | Summary                                                                                                                                                                                                         |
|---------------|-------------------------------------------------------------------------------------|-----------------------|-----------------|---------------------------------------------------------------------------------|-----------------------------------------------------------------------------------------------------------------------------------------------------------------------------------------------------------------|
| Saquinavir    | 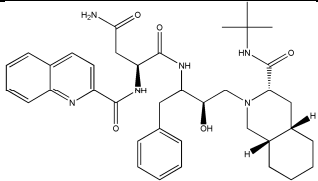  | −10.8                 | 670.8           | C <sub>38</sub> H <sub>50</sub> N <sub>6</sub> O <sub>5</sub>                   | HIV protease inhibitor used in combination with other antiretroviral agents for the treatment of HIV-1 with advanced immunodeficiency.                                                                          |
| Teniposide    |  | −10.1                 | 656.7           | C <sub>32</sub> H <sub>32</sub> O <sub>13</sub> S                               | Cytotoxic drug used as an adjunct for chemotherapy induction in the treatment of refractory childhood acute lymphoblastic leukemia.                                                                             |
| Conivaptan    |  | −10                   | 498.6           | C <sub>32</sub> H <sub>26</sub> N <sub>4</sub> O <sub>2</sub>                   | Antidiuretic hormone inhibitor used to raise serum sodium levels.                                                                                                                                               |
| Lifitegrast   |  | −10                   | 615.5           | C <sub>29</sub> H <sub>24</sub> Cl <sub>2</sub> N <sub>2</sub> O <sub>7</sub> S | Medication used to treat dry eye disease.                                                                                                                                                                       |
| Simeprevir    |  | −9.9                  | 749.9           | C <sub>38</sub> H <sub>47</sub> N <sub>5</sub> O <sub>7</sub> S <sub>2</sub>    | Direct-acting antiviral agent that inhibits HCV NS3/4A protease to treat chronic hepatitis C virus (HCV) infection in adults with HCV genotype 1 or 4.                                                          |
| Nilotinib     |  | −9.8                  | 529.5           | C <sub>28</sub> H <sub>22</sub> F <sub>3</sub> N <sub>7</sub> O                 | Kinase inhibitor used for the chronic phase treatment of Chronic Myeloid Leukemia (CML) that is Philadelphia chromosome-positive and for the treatment of CML that is resistant to therapy containing imatinib. |

|                   |                                                                                     |      |       |              |                                                                                                                                                                                                                                        |
|-------------------|-------------------------------------------------------------------------------------|------|-------|--------------|----------------------------------------------------------------------------------------------------------------------------------------------------------------------------------------------------------------------------------------|
| Rifaximin         | 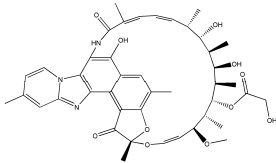   | −9.8 | 785.9 | C43H51N3O11  | Rifaximin-based non-systemic antibiotic used for the treatment of gastrointestinal bacterial infections, such as traveler's diarrhea and irritable bowel syndrome, and reduction in overt hepatic encephalopathy recurrence in adults. |
| Dutasteride       |    | −9.7 | 528.5 | C27H30F6N2O2 | Antandrogenic compound that is used for the treatment of symptomatic benign prostatic hyperplasia (BPH) in adult males by inhibiting 5-alpha reductase.                                                                                |
| Etoposide         |    | −9.7 | 588.6 | C29H32O13    | Podophyllotoxin derivative used to treat testicular and small cell lung tumors.                                                                                                                                                        |
| Ergotamine        |   | −9.6 | 581.7 | C33H35N5O5   | Alpha-1 selective adrenergic agonist vasoconstrictor used to treat migraines with or without aura and cluster headaches.                                                                                                               |
| Lurasidone        |  | −9.5 | 492.7 | C28H36N4O2S  | Atypical antipsychotic used to treat schizophrenia and depressive episodes associated with bipolar I disorder.                                                                                                                         |
| Dihydroergotamine |  | −9.5 | 583.7 | C33H37N5O5   | Ergot alkaloid used in the acute treatment of migraine headaches and cluster headaches.                                                                                                                                                |
| Naldemedine       |  | −9.5 | 570.6 | C32H34N4O6   | Opioid antagonist used to treat opioid-induced constipation.                                                                                                                                                                           |

\* Affinity binding energy of virtual screening results by AutoDock vina program.

**Table S2.** The properties and energy score of the potential P<sub>AN</sub>-I38T endonuclease inhibitors.

| Chemical name | Structure                                                                           | Energy*<br>(kcal/mol) | M <sub>wt</sub> | Chemical Formula                                                                | Summary                                                                                                                                                                                                                                |
|---------------|-------------------------------------------------------------------------------------|-----------------------|-----------------|---------------------------------------------------------------------------------|----------------------------------------------------------------------------------------------------------------------------------------------------------------------------------------------------------------------------------------|
| Saquinavir    | 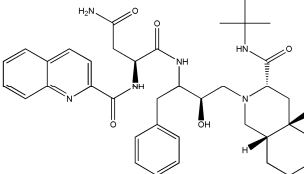   | −10.3                 | 670.8           | C <sub>38</sub> H <sub>50</sub> N <sub>6</sub> O <sub>5</sub>                   | HIV protease inhibitor used in combination with other antiretroviral agents for the treatment of HIV-1 with advanced immunodeficiency.                                                                                                 |
| Conivaptan    |    | −10.1                 | 498.6           | C <sub>32</sub> H <sub>26</sub> N <sub>4</sub> O <sub>2</sub>                   | Antidiuretic hormone inhibitor used to raise serum sodium levels.                                                                                                                                                                      |
| Nilotinib     |    | −10                   | 529.5           | C <sub>28</sub> H <sub>22</sub> F <sub>3</sub> N <sub>7</sub> O                 | Kinase inhibitor used for the chronic phase treatment of Chronic Myeloid Leukemia (CML) that is Philadelphia chromosome-positive and for the treatment of CML that is resistant to therapy containing imatinib.                        |
| Teniposide    |   | −9.9                  | 656.7           | C <sub>32</sub> H <sub>32</sub> O <sub>13</sub> S                               | Cytotoxic drug used as an adjunct for chemotherapy induction in the treatment of refractory childhood acute lymphoblastic leukemia.                                                                                                    |
| Lifitegrast   |  | −9.9                  | 615.5           | C <sub>29</sub> H <sub>24</sub> Cl <sub>2</sub> N <sub>2</sub> O <sub>7</sub> S | Medication used to treat dry eye disease.                                                                                                                                                                                              |
| Naldemedine   |  | −9.9                  | 570.6           | C <sub>32</sub> H <sub>34</sub> N <sub>4</sub> O <sub>6</sub>                   | Opioid antagonist used to treat opioid-induced constipation.                                                                                                                                                                           |
| Simeprevir    |  | −9.9                  | 749.9           | C <sub>38</sub> H <sub>47</sub> N <sub>5</sub> O <sub>7</sub> S <sub>2</sub>    | Direct-acting antiviral agent that inhibits HCV NS3/4A protease to treat chronic hepatitis C virus (HCV) infection in adults with HCV genotype 1 or 4.                                                                                 |
| Rifaximin     |  | −9.9                  | 785.9           | C <sub>43</sub> H <sub>51</sub> N <sub>3</sub> O <sub>11</sub>                  | Rifamycin-based non-systemic antibiotic used for the treatment of gastrointestinal bacterial infections, such as traveler's diarrhea and irritable bowel syndrome, and reduction of overt hepatic encephalopathy recurrence in adults. |
| Ergotamine    |  | −9.7                  | 581.7           | C <sub>33</sub> H <sub>35</sub> N <sub>5</sub> O <sub>5</sub>                   | Alpha-1 selective adrenergic agonist vasoconstrictor used to treat migraines with or without aura and cluster headaches.                                                                                                               |

\* Affinity binding energy of virtual screening results by AutoDock vina program.

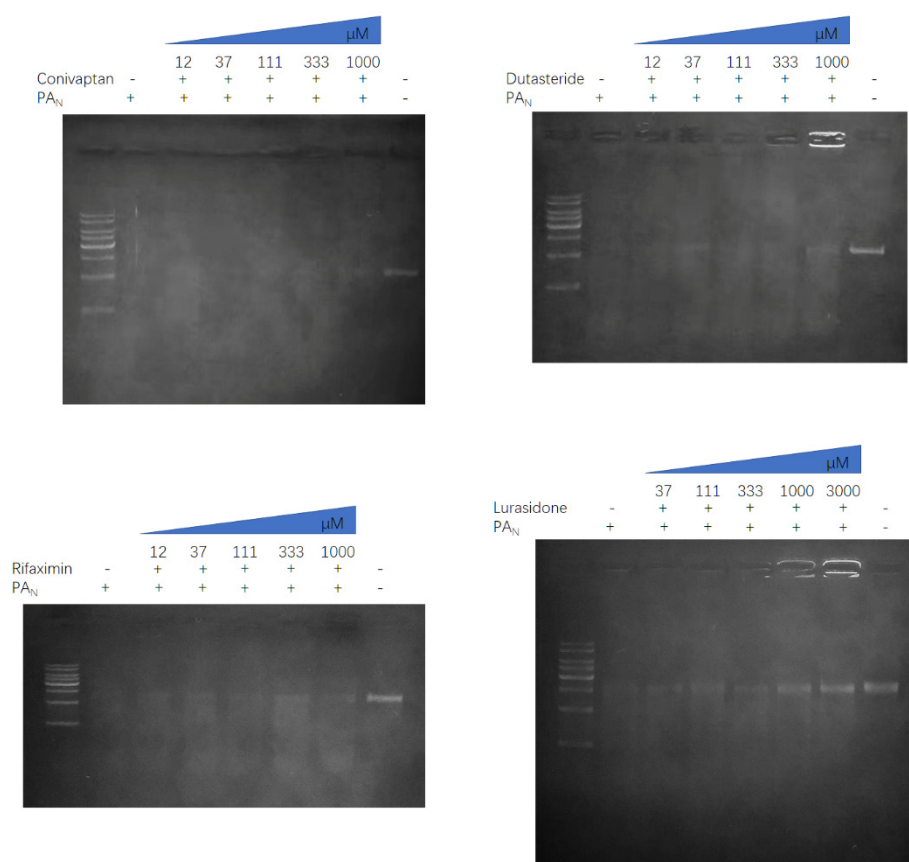

**Figure S1.** Compounds inhibition for the endonuclease activity of P<sub>A<sub>N</sub></sub>. Different concentrations of conivaptan (0–333 μM), dutasteride (0–1000 μM), rifaximin (0–1000 μM), and lurasidone (0–3000 μM) incubated with the PA and substrate ssDNA for 1 h at 37 °C.

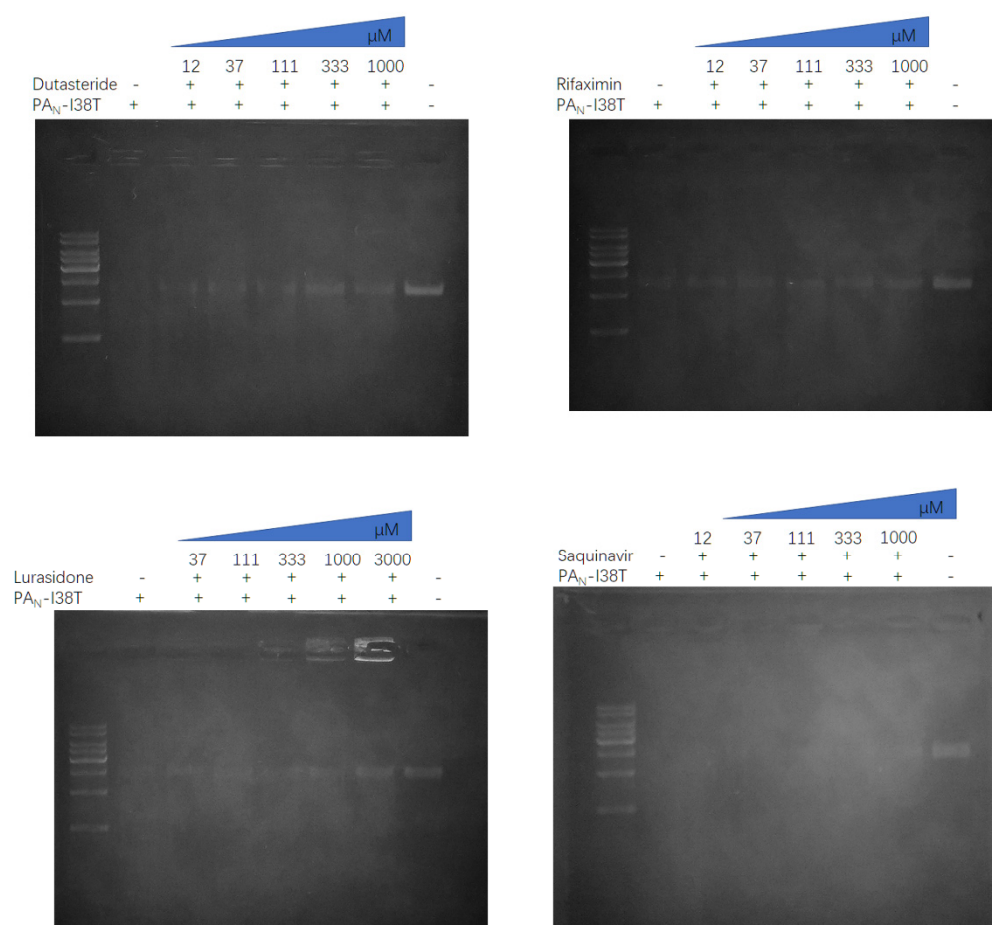

**Figure S2.** Compounds inhibition for the endonuclease activity of PA<sub>N</sub>-I38T. Different concentrations of dutasteride (0–1000μM), rifaximin (0–1000μM), saquinavir (0–1000μM), and lurasidone (0–3000μM) incubated with the PA<sub>N</sub>-I38T and substrate ssDNA for 1h at 37 °C.
